# Supplementary material for: Electrochemically modified Corey–Fuchs reaction for the synthesis of arylalkynes. The case of 2-(2,2-dibromovinyl)naphthalene
Source: publisher site journal article supplement (doi:10.3762/bjoc.14.76), 2018-04-23

**Supporting Information**  
**for**  
**Electrochemically modified Corey–Fuchs reaction for**  
**the synthesis of arylalkynes. The case of 2-(2,2-**  
**dibromovinyl)naphthalene**

Fabiana Pandolfi, Isabella Chiarotto and Marta Feroci\*

Address: <sup>1</sup>Department of Fundamental and Applied Sciences for Engineering (SBAI),  
Sapienza University of Rome, via Castro Laurenziano, 7, 00161, Rome, Italy.

Email: Marta Feroci - marta.feroci@uniroma1.it

\*Corresponding author

**Detailed experimental procedures, NMR spectra and cyclic voltammetries**

**Table of Contents**

|                                                                                              |     |
|----------------------------------------------------------------------------------------------|-----|
| General remarks .....                                                                        | S2  |
| Cyclic voltammetries .....                                                                   | S2  |
| Electrolyses .....                                                                           | S2  |
| Synthesis of 2,2-dibromoalkenes.....                                                         | S3  |
| Spectral data of electrolysis products.....                                                  | S3  |
| Peak potentials table for 2-(2,2-dibromovinyl)naphthalene and its electrolysis products..... | S5  |
| Voltammetric curves.....                                                                     | S6  |
| <sup>1</sup> H and <sup>13</sup> C NMR spectra.....                                          | S13 |

## General remarks

Anhydrous *N,N*-dimethylformamide (DMF) and acetonitrile (ACN) were commercially available and used as received. Tetraethylammonium tetrafluoroborate was commercially available and kept under reduced pressure 12 h prior to use. Commercially available reagents were used without further purification. Flash column chromatography was carried out using Merck 60 silica gel (230–400 mesh) under pressure. GC–MS measurements were carried out on an SE 54 capillary column using a Hewlett-Packard 5890 series II gas chromatograph coupled with a Hewlett-Packard 5871 series II quadrupole mass selective detector. ESI mass spectra were recorded on a ThermoFinnigan LCQ Classic LC/MS/MS ion trap equipped with an ESI source and a syringe pump. Samples ( $10^{-5}$  M in MeOH/H<sub>2</sub>O 80:20) were infused in the electrospray system at a flow rate of 5–10  $\mu\text{L min}^{-1}$ . In order to promote the analyte ionization, 50  $\mu\text{L}$  of  $10^{-2}$  M HCOOH were added to the sample solutions. <sup>1</sup>H and <sup>13</sup>C NMR spectra were recorded at room temperature using a Bruker AC 200 spectrometer as CDCl<sub>3</sub> solution using the residual solvent signal as internal standard.

## Cyclic voltammetry

Voltammetric measurements were performed using an Amel 2053 potentiostat-galvanostat equipped with an Amel 7800 interface in a three-electrode cell; acquisition software was a CorrWare for Windows version 2.8d1 Scribner, elaboration software was a CorrView for Windows version 2.8d1 Scribner.

492/PT/1, 492/GC/3 and 492/AG/1 Amel microelectrodes were employed, using a Pt wire counter electrode and modified saturated calomel electrode as reference electrode (mSCE: SCE with organic solvent junction; the oxidation peak potential, on GC electrode, of ferrocene in DMF/0.1 M Et<sub>4</sub>NBF<sub>4</sub> with this reference electrode is  $E_{\text{oxFc}} = + 0.512$  V.). The scan rate was  $v = 0.2$  V s<sup>-1</sup>. All cyclic voltammetry measurements were recorded using 5 mL of DMF/0.1 M Et<sub>4</sub>NBF<sub>4</sub> at 25 °C, unless otherwise specified.

## Electrolyses

Constant potential or current electrolyses were performed under a nitrogen atmosphere, at 25 °C, using an Amel 2053 potentiostat-galvanostat equipped with an Amel 731 integrator. All the experiments were carried out in a divided glass cell separated through a porous glass plug filled with a layer of gel (i.e., methyl cellulose 0.5 vol % dissolved in DMF/Et<sub>4</sub>NBF<sub>4</sub> 1.0 mol dm<sup>-3</sup>); Pt spirals (apparent area 0.8 cm<sup>2</sup>) were used as both cathode and anode, unless otherwise specified. Catholyte: 5 mL of DMF/0.1 M Et<sub>4</sub>NBF<sub>4</sub>. Anolyte: 2 mL of the same solvent of catholyte; 0.5 mmol of starting 2,2-dibromovinylarene were present in the catholyte during electrolysis. The number of coulombs and the electrolysis potential/current were varied as reported in the text. At the end of the electrolysis, the catholyte was poured in an excess of water and extracted with petroleum ether 40–60 (3 × 20 mL). Flash column chromatography (eluent: petroleum ether/ethyl acetate from 100:0 to 90:10) gave purified products.

## Synthesis of starting 2,2-dibromoalkenes

All starting 2,2-dibromoalkenes were synthesized following the procedure described in Uenishi, J.; Kawahama, R.; Yonemitsu, O.; Tsuji, J. *J. Org. Chem.* **1998**, *63*, 8965-8975. DOI: 10.1021/jo9812781.

All the compounds gave spectral data in accordance with the literature.

### **2-(2,2-Dibromovinyl)naphthalene (1a)** (Rao, M. L. N.; Jadhav, D. N.; Dasgupta, P. *Org. Lett.* **2010**, *12*, 2048-2051)

$R_f$  (petroleum ether 40-60) = 0.52.  $^1\text{H}$  NMR ( $\text{CDCl}_3$ , 200 MHz):  $\delta$  8.03 (s, 1H), 7.88 -7.82 (m, 3H), 7.68-7.63 (m, 2H), 7.56-7.49 (m, 2H).  $^{13}\text{C}$  NMR ( $\text{CDCl}_3$ , 50.3 MHz):  $\delta$  136.9, 133.0, 132.7, 128.3, 128.1, 128.0, 127.7, 126.7, 126.5, 125.6, 89.8. MS (EI),  $m/z$  (relative intensity): 314 (30%,  $\text{M}^+ + 4$ ), 312 (65%,  $\text{M}^+ + 2$ ), 310 (29%,  $\text{M}^+$ ), 153 (15%), 152 (100%), 151 (29%).

### **3-(2,2-Dibromovinyl)-9-ethyl-9H-carbazole (1b)** (Cheung, C. W.; Hu, X. *Chem. Eur. J.* **2015**, *21*, 18439-18444)

$R_f$  (petroleum ether 40-60/ethyl acetate 90:10) = 0.60.  $^1\text{H}$  NMR ( $\text{CDCl}_3$ , 200 MHz):  $\delta$  8.36 (s, 1H), 8.11 (d,  $J = 7.6$  Hz, 1H), 7.71-7.67 (m, 2H), 7.54-7.23 (m, 4H), 4.38 (q,  $J = 7.2$  Hz, 2H), 1.46 (t,  $J = 7.2$  Hz, 3H).  $^{13}\text{C}$  NMR ( $\text{CDCl}_3$ , 50.3 MHz):  $\delta$  140.3, 139.7, 137.5, 126.3, 126.1, 126.0, 122.8, 120.7, 120.5, 119.3, 108.7, 108.2, 86.5, 37.7, 13.8. MS (EI),  $m/z$  (relative intensity): 381 (33%,  $\text{M}^+ + 4$ ), 379 (65%,  $\text{M}^+ + 2$ ), 377 (35%,  $\text{M}^+$ ), 366 (25%), 364 (54%), 362 (29%), 219 (19%), 204 (100%), 190 (55%), 176 (30%).

### **1-(2,2-Dibromovinyl)-4-methoxybenzene (1c)** (Rao, M. L. N.; Jadhav, D. N.; Dasgupta, P. *Org. Lett.* **2010**, *12*, 2048-2051)

$R_f$  (petroleum ether 40-60/ethyl acetate 90:10) = 0.55.  $^1\text{H}$  NMR ( $\text{CDCl}_3$ , 200 MHz):  $\delta$  7.52 (d,  $J = 8.6$  Hz, 2H), 7.42 (s, 1H), 6.90 (d,  $J = 8.6$  Hz, 2H), 3.84 (s, 3H).  $^{13}\text{C}$  NMR ( $\text{CDCl}_3$ , 50.3 MHz):  $\delta$  159.7, 136.3, 129.9, 127.8, 113.8, 87.3, 55.3. MS (EI),  $m/z$  (relative intensity): 294 (49%,  $\text{M}^+ + 4$ ), 292 (100%,  $\text{M}^+ + 2$ ), 290 (53%,  $\text{M}^+$ ), 279 (14%), 277 (29%), 275 (14%), 132 (60%), 89 (73%).

## Electrolysis products

### **2-Ethynynaphthalene (2a)** (Pünner, F.; Hilt, G. *Chem. Commun.*, **2012**, *48*, 3617-3619)

$R_f$  (petroleum ether 40-60) = 0.41.  $^1\text{H}$ -NMR ( $\text{CDCl}_3$ , 200 MHz):  $\delta$  8.05 (s, 1H), 7.86 -7.78 (m, 3H), 7.56-7.49 (m, 3H), 3.16 (s, 1H).  $^{13}\text{C}$ -NMR ( $\text{CDCl}_3$ , 50 MHz):  $\delta$  133.0, 132.8, 132.3, 128.5, 128.0, 127.8, 126.9, 126.6, 119.4, 84.0, 77.4. MS (EI),  $m/z$  (relative intensity): 153 (21%,  $\text{M}^+ + 1$ ), 152 (100%,  $\text{M}^+$ ), 151 (40%), 126 (9%), 76 (21%), 63 (17%).

### **2-(Bromoethynyl)naphthalene (3a)** (Okutani, M. Mori Y. *J. Org. Chem.* **2009**, *74*, 442-444)

$R_f$  (petroleum ether 40-60) = 0.51.  $^1\text{H}$ -NMR ( $\text{CDCl}_3$ , 200 MHz):  $\delta$  7.99 (s, 1H), 7.84 -7.76 (m, 3H), 7.55-7.46 (m, 3H).  $^{13}\text{C}$ -NMR ( $\text{CDCl}_3$ , 50 MHz):  $\delta$  132.9, 132.8, 132.1, 128.4, 128.0, 127.7, 127.7, 126.9, 126.6, 120.0, 80.4, 50.0. MS (EI),  $m/z$  (relative intensity): 232 (52%,  $\text{M}^+ + 2$ ), 230 (50%,  $\text{M}^+$ ), 151 (100%), 150 (70%), 74 (65%), 62 (51%).

**9-Ethyl-3-ethynyl-9H-carbazole (2b)** (Misra, R.; T. Jadhav, T.; Dhokale, B. ; P. Gautam, P.; Sharma, R.; Maragani, R.; Mobin, S. M. *Dalton Trans.*, **2014**, 43, 13076–13086)

R<sub>f</sub> (petroleum ether 40-60/ethyl acetate 90:10) = 0.55. <sup>1</sup>H NMR (CDCl<sub>3</sub>, 200 MHz): δ 8.29 (s, 1H), 8.10 (d, *J* = 7.8 Hz, 1H), 7.65-7.25 (m, 5H), 4.36 (q, *J* = 7.2 Hz, 2H), 3.11 (s, 1H), 1.44 (t, *J* = 7.2 Hz, 3H). <sup>13</sup>C NMR (CDCl<sub>3</sub>, 50.3 MHz): δ 140.3, 139.8, 129.6, 126.2, 124.7, 122.8, 122.4, 120.6, 119.4, 111.9, 108.7, 108.4, 85.1, 75.1, 37.6, 13.8. MS (ESI), *m/z* (M + H<sup>+</sup>): 220.18.

**1-Ethynyl-4-methoxybenzene (2c)** (Rassadin, V. A.; Nicolas, E.; Six, Y. *Chem. Commun.*, **2014**, 50, 7666-7669)

R<sub>f</sub> (petroleum ether 40-60) = 0.50. <sup>1</sup>H-NMR (CDCl<sub>3</sub>, 200 MHz): δ 7.44 (d, *J* = 7.6 Hz, 2H), 6.85 (d, *J* = 7.6 Hz, 2H), 3.82 (s, 3H), 3.01 (s, 1H). <sup>13</sup>C-NMR (CDCl<sub>3</sub>, 50 MHz): δ 159.9, 133.6, 114.2, 113.9, 83.6, 55.2. MS (EI), *m/z* (relative intensity): 132 (32%, M<sup>+</sup>), 117 (23%), 101 (15%), 89 (100%), 63 (81%), 62 (68%).

**Table S1:** Cathodic peak potentials from cyclic voltammetry experiments of 2-(2,2-dibromovinyl)naphthalene and its electrolysis products ( $2 \times 10^{-2}$  M in DMF or CAN/0.1 M Et<sub>4</sub>NBF<sub>4</sub>). Working electrode: Pt, Ag, GC.  $\nu = 0.2$  V s<sup>-1</sup>,  $T = 25$  °C. Reference electrode: SCE.

| Substrate         | 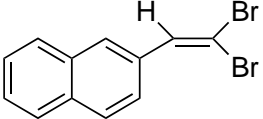 <b>1a</b> |                       |                       |  <b>2a</b> |  <b>3a</b> |  <b>5a</b> |                       |
|-------------------|---------------------------------------------------------------------------------------------|-----------------------|-----------------------|-----------------------------------------------------------------------------------------------|-----------------------------------------------------------------------------------------------|-----------------------------------------------------------------------------------------------|-----------------------|
| Electrode/Solvent | <b>E<sub>p1</sub></b>                                                                       | <b>E<sub>p2</sub></b> | <b>E<sub>p3</sub></b> | <b>E<sub>p1</sub></b>                                                                         | <b>E<sub>p1</sub></b>                                                                         | <b>E<sub>p2</sub></b>                                                                         | <b>E<sub>p1</sub></b> |
| Pt/ACN            | -1.69 V                                                                                     | -1.91 V               | -2.42 V               | -2.36 V                                                                                       | -1.75 V                                                                                       | -2.32 V                                                                                       |                       |
| Pt/DMF            | -1.79 V                                                                                     | -1.96 V               | -2.47 V               | -2.47 V                                                                                       | -                                                                                             | -                                                                                             | -2.09 V               |
| GC/ACN            | -1.74 V                                                                                     | -1.91 V               | -2.57 V               | -2.47 V                                                                                       | -1.74 V                                                                                       | -2.43 V                                                                                       | -1.92 V               |
| GC/DMF            | -1.83 V                                                                                     | -2.05 V               | -2.67 V               | -2.64 V                                                                                       | -1.77 V                                                                                       | -2.40 V                                                                                       |                       |
| Ag/DMF            | -1.64 V                                                                                     | -1.94 V               | -2.49 V               | -2.42 V                                                                                       | -1.68 V                                                                                       | -2.34 V                                                                                       |                       |
| Ag/ACN            | -1.62 V                                                                                     | -1.87 V               | -2.52 V               | -2.44 V                                                                                       | -1.59 V                                                                                       | -2.38 V                                                                                       | -2.00 V               |

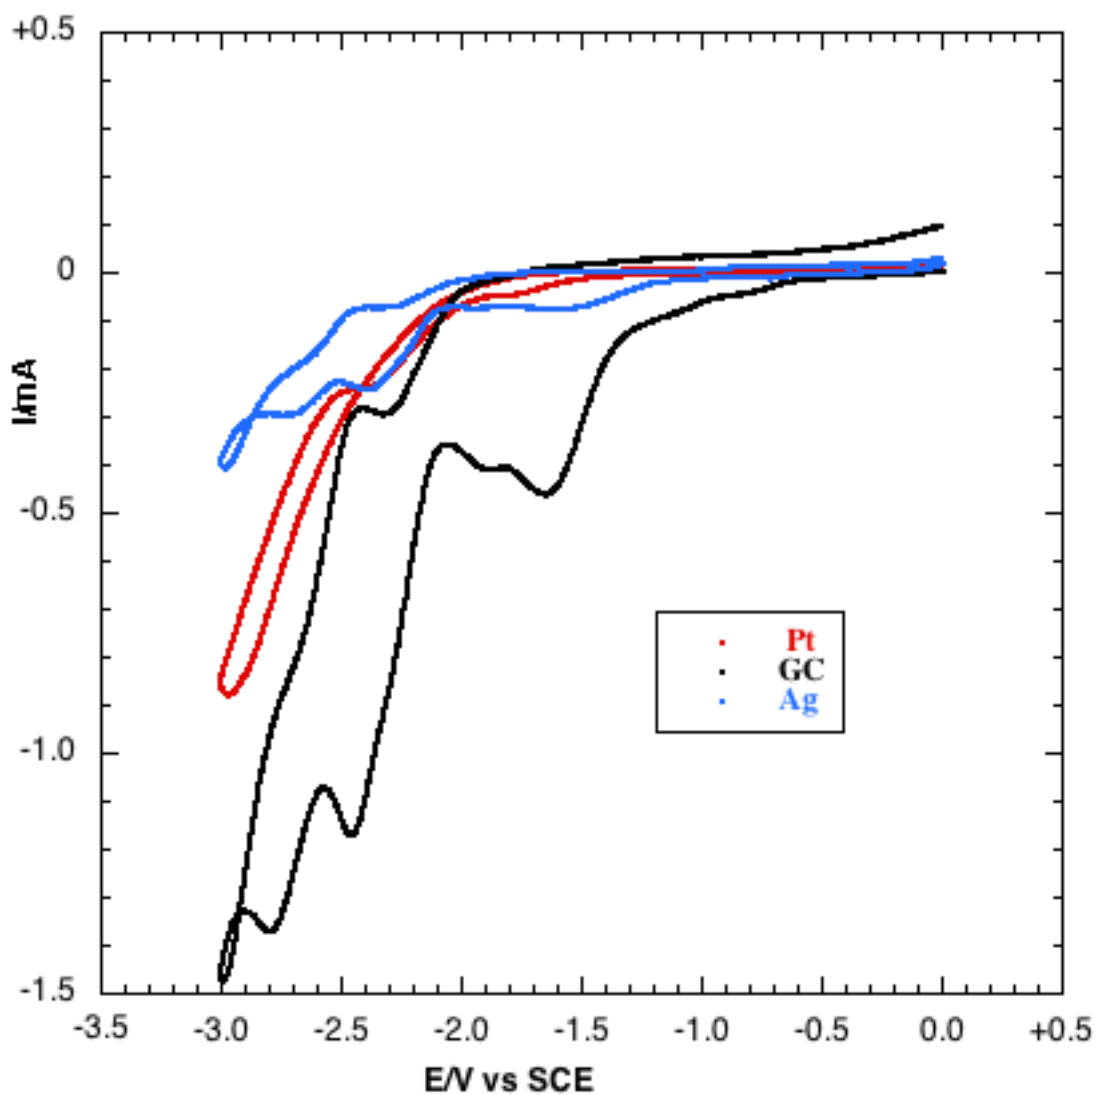

**Figure S1:** Cyclic voltammograms of 2-(bromoethynyl)naphthalene (**3a**),  $2 \times 10^{-2}$  M in CAN/ $0.1$  M  $\text{Et}_4\text{NBF}_4$ . Working electrode: Pt, Ag, GC.  $\nu = 0.2$  V  $\text{s}^{-1}$ ,  $T = 25$  °C.

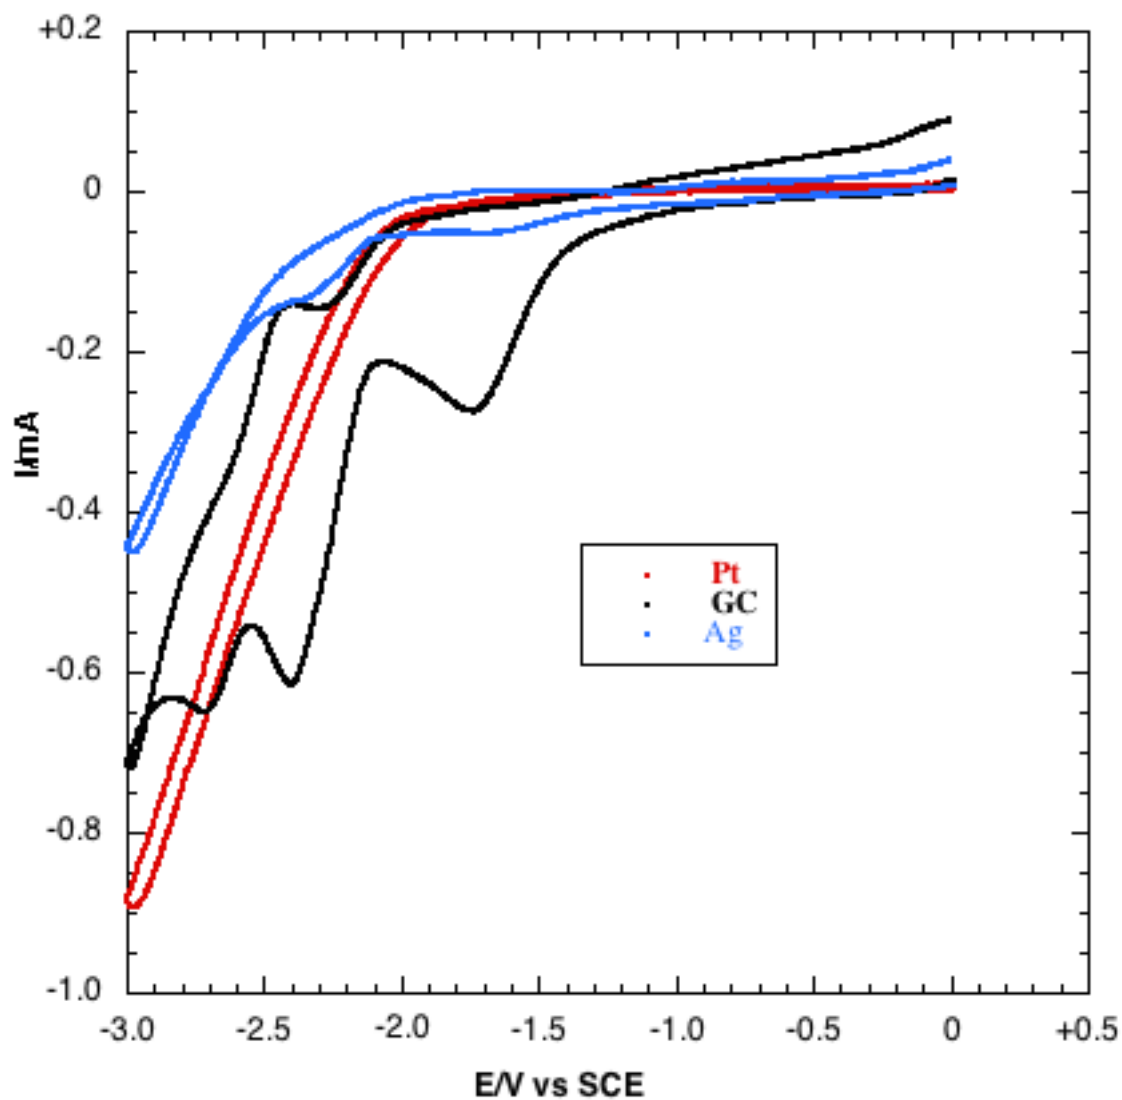

**Figure S2:** Cyclic voltammograms of 2-(bromoethynyl)naphthalene (**3a**),  $6 \times 10^{-3}$  M in DMF/0.1 M Et<sub>4</sub>NBF<sub>4</sub>. Working electrode: Pt, Ag, GC.  $\nu = 0.2$  V s<sup>-1</sup>,  $T = 25$  °C.

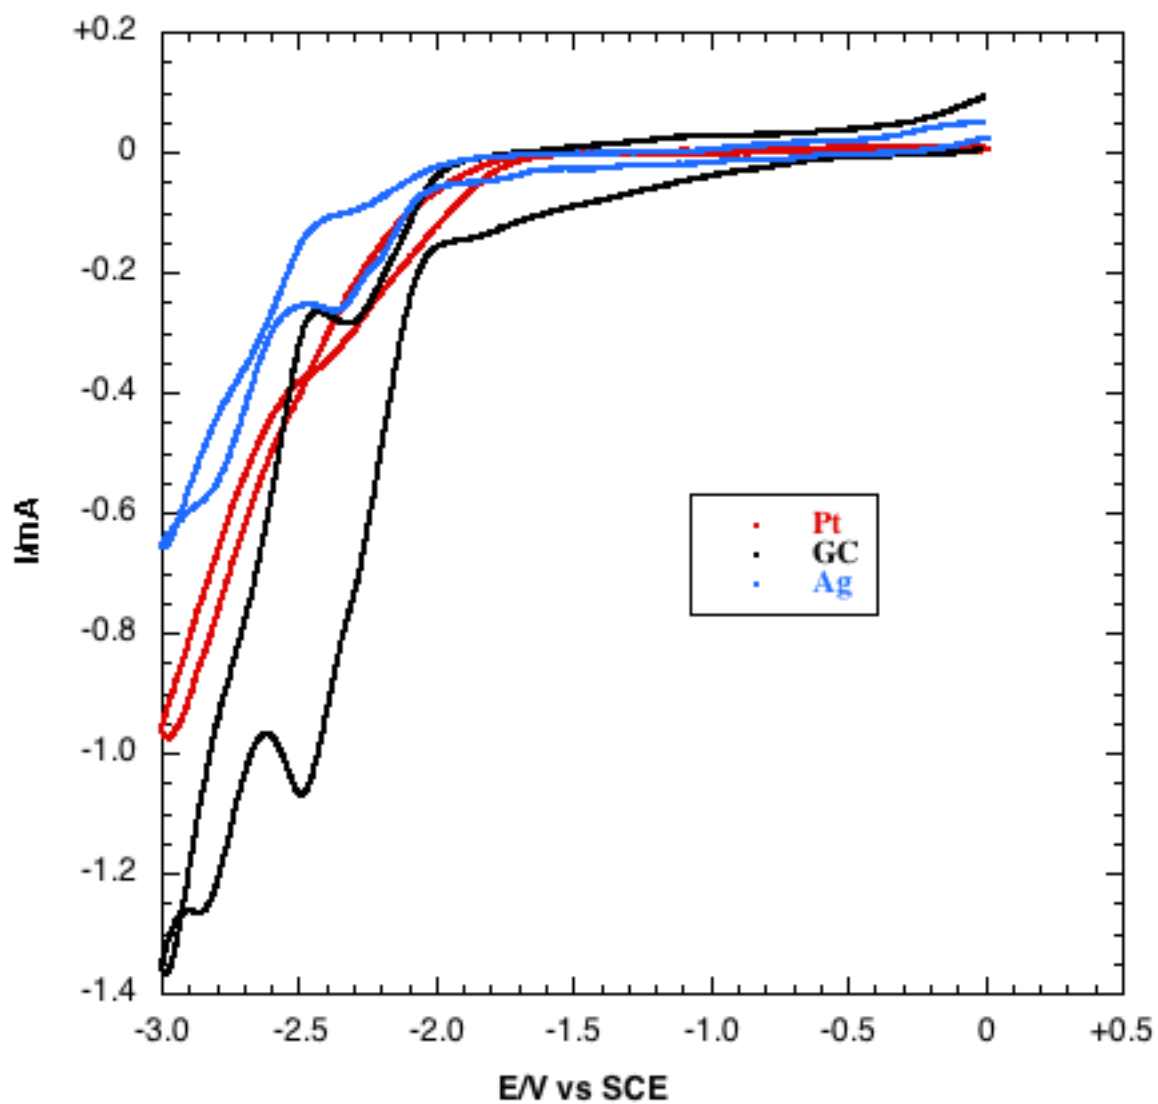

**Figure S3:** Cyclic voltammograms of 2-ethynynaphthalene (**2a**),  $2 \times 10^{-2}$  M in CAN/0.1 M  $\text{Et}_4\text{NBF}_4$ . Working electrode: Pt, Ag, GC.  $\nu = 0.2 \text{ V s}^{-1}$ ,  $T = 25 \text{ }^\circ\text{C}$ .



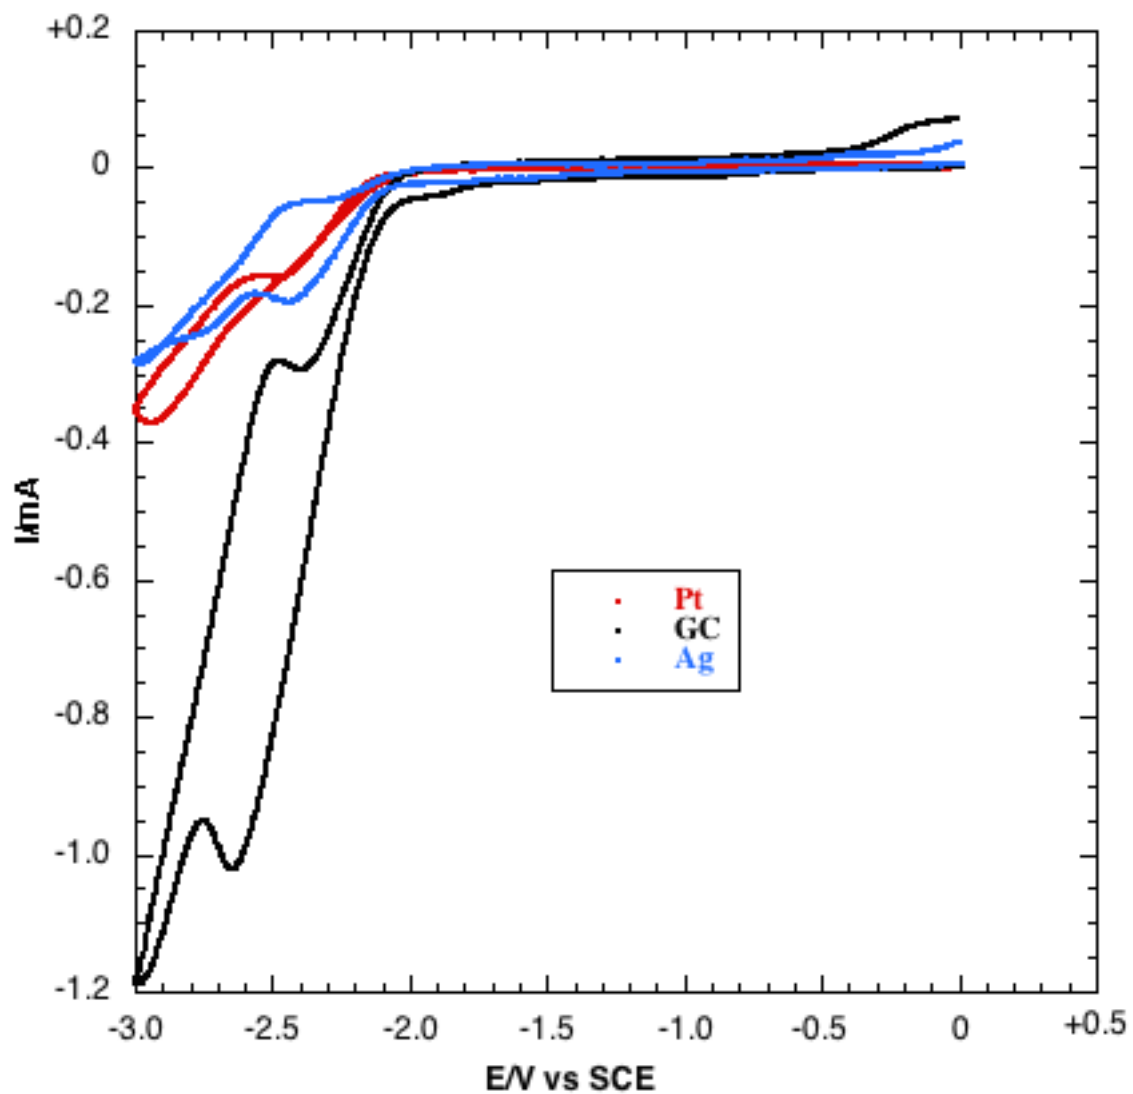

**Figure S4:** Cyclic voltammograms of 2-ethynynaphthalene (**2a**),  $2 \times 10^{-2}$  M in DMF/0.1 M  $\text{Et}_4\text{NBF}_4$ . Working electrode: Pt, Ag, GC.  $\nu = 0.2 \text{ V s}^{-1}$ ,  $T = 25 \text{ }^\circ\text{C}$ .

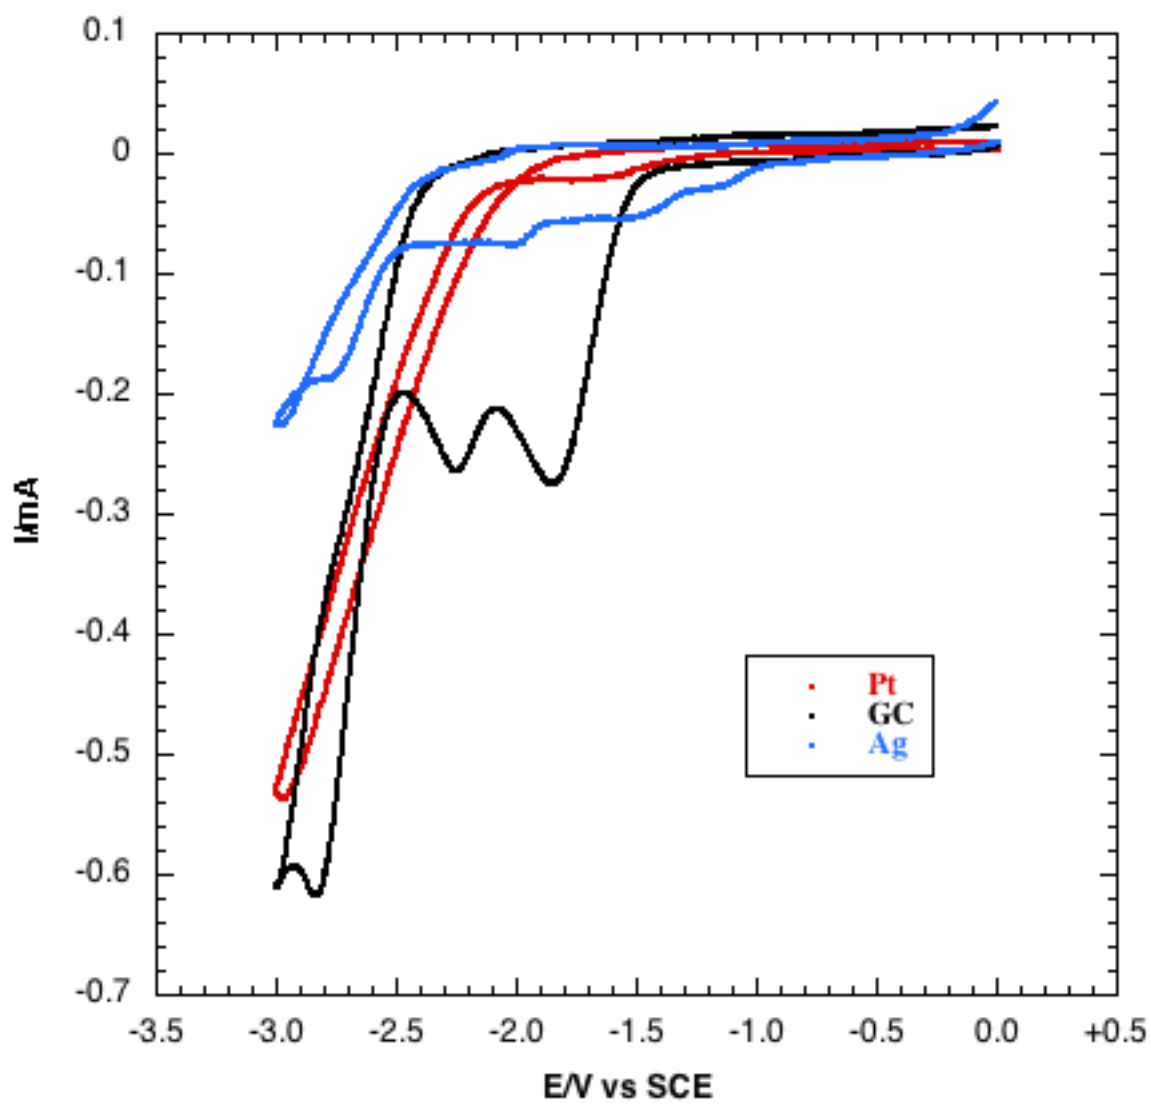

**Figure S5:** Cyclic voltammograms of 1-(2,2-dibromovinyl)-4-methoxybenzene (**1c**),  $2 \times 10^{-2}$  M in DMF/0.1 M Et<sub>4</sub>NBF<sub>4</sub>. Working electrode: Pt, Ag, GC.  $\nu = 0.2 \text{ V s}^{-1}$ ,  $T = 25 \text{ }^\circ\text{C}$ .

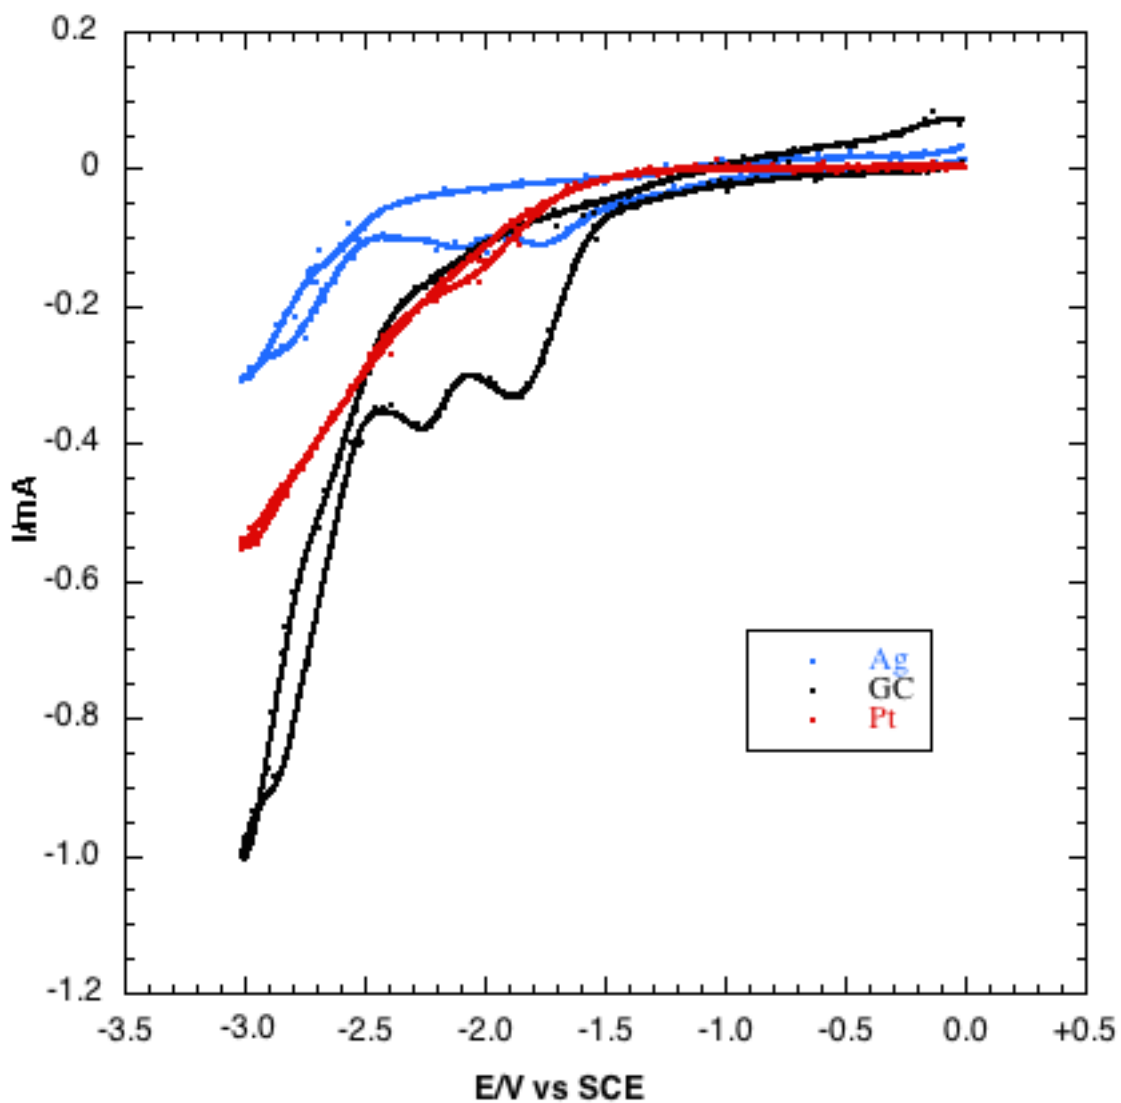

**Figure S6:** Cyclic voltammograms of 3-(2,2-dibromovinyl)-9-ethyl-9*H*-carbazole (**1b**),  $2 \times 10^{-2}$  M in DMF/0.1 M Et<sub>4</sub>NBF<sub>4</sub>. Working electrode: Pt, Ag, GC.  $\nu = 0.2 \text{ V s}^{-1}$ ,  $T = 25 \text{ }^\circ\text{C}$ .

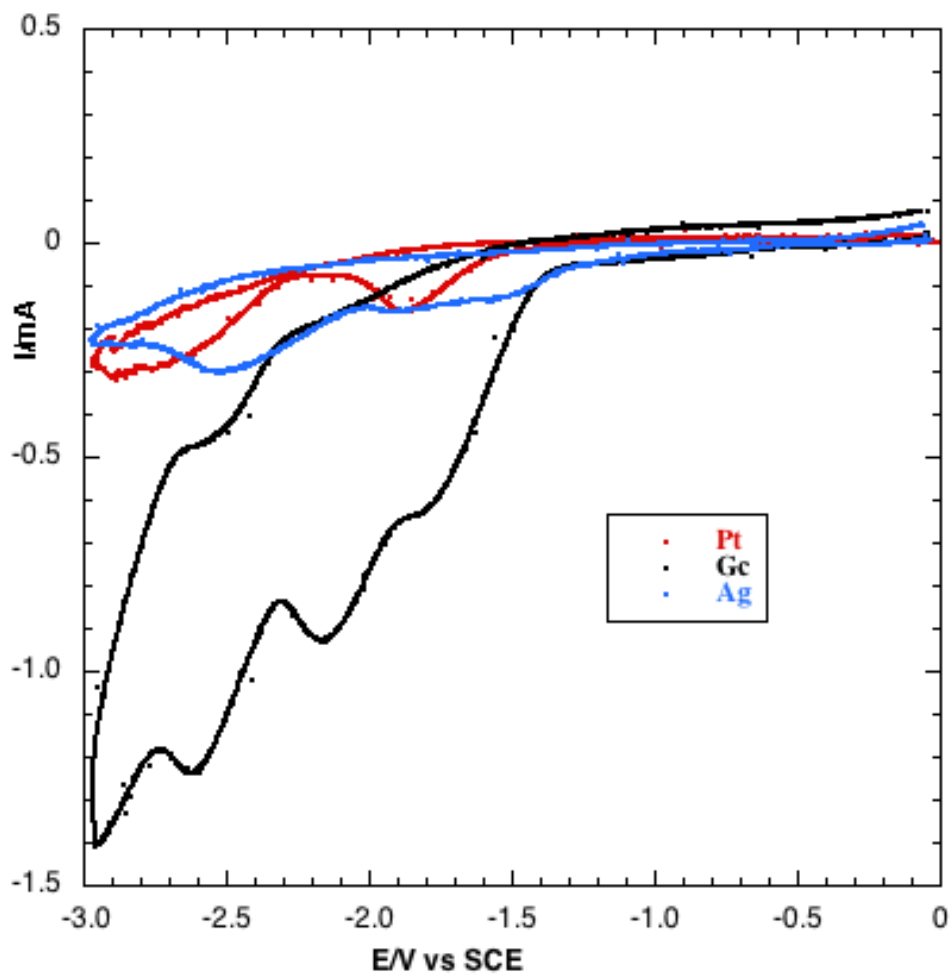

**Figure S7:** Cyclic voltammograms of 2-(2,2-dibromovinyl)naphthalene (**1a**),  $2 \times 10^{-2}$  M in DMF/0.1 M NaClO<sub>4</sub>. Working electrode: Pt, Ag, Gc.  $\nu = 0.2 \text{ V s}^{-1}$ ,  $T = 25 \text{ }^\circ\text{C}$ .

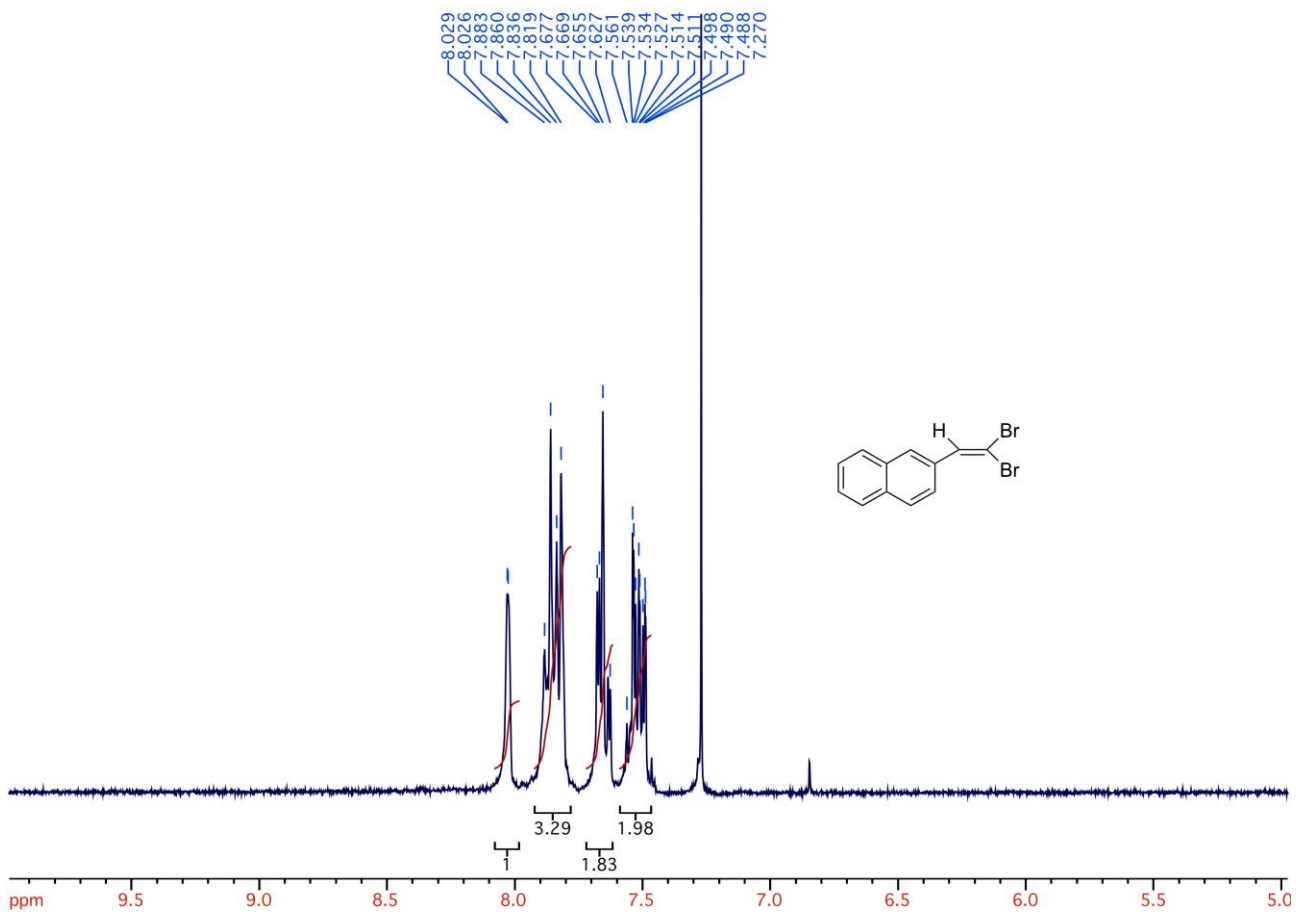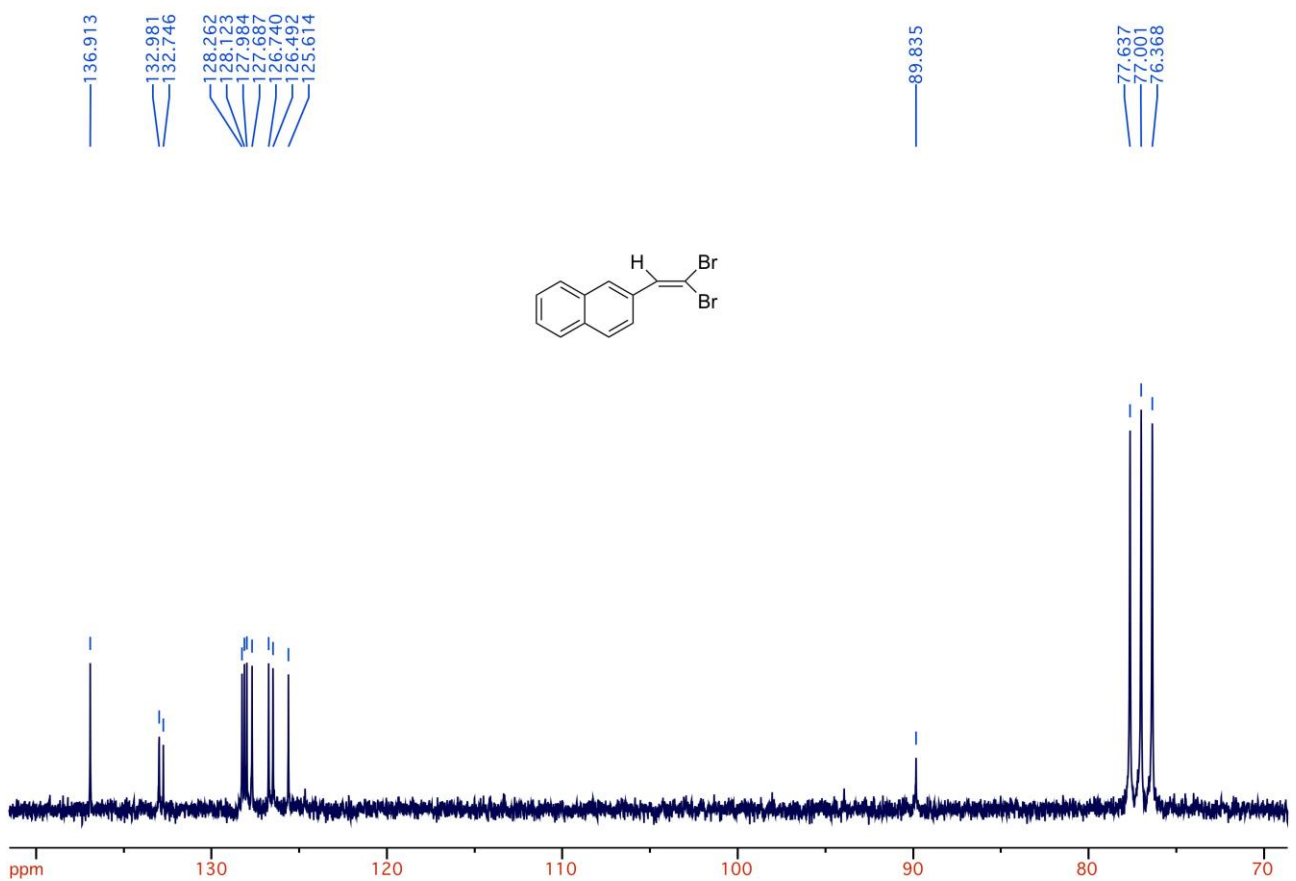

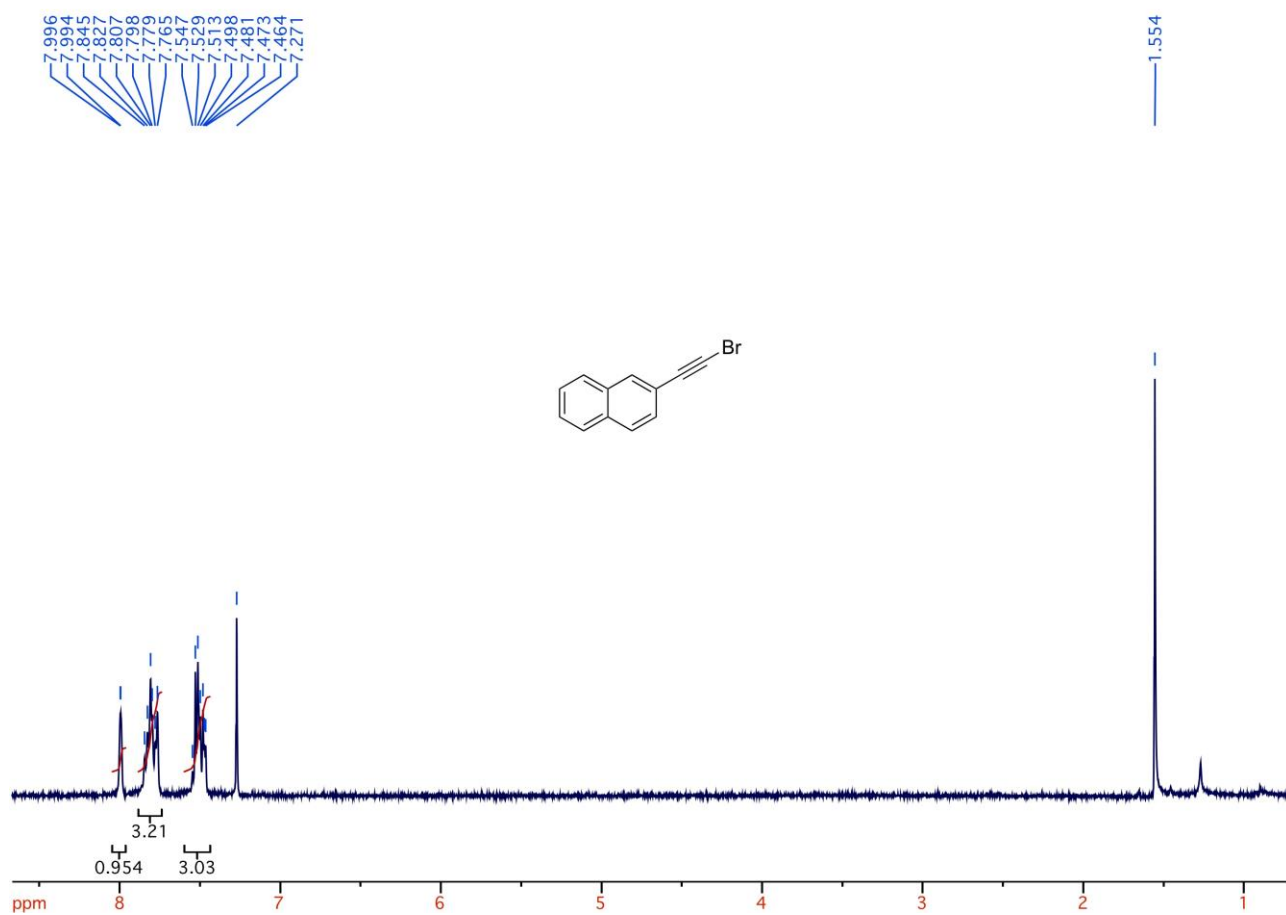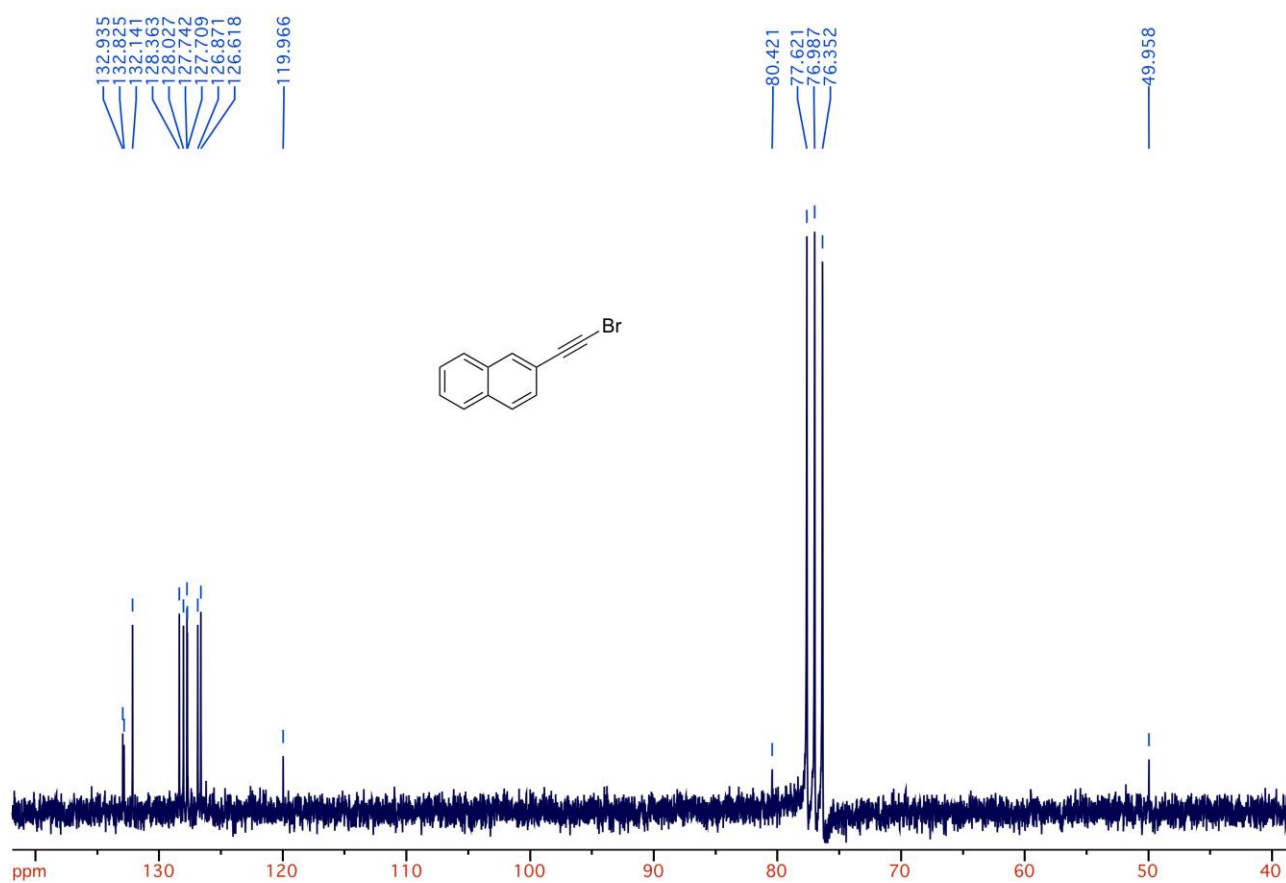

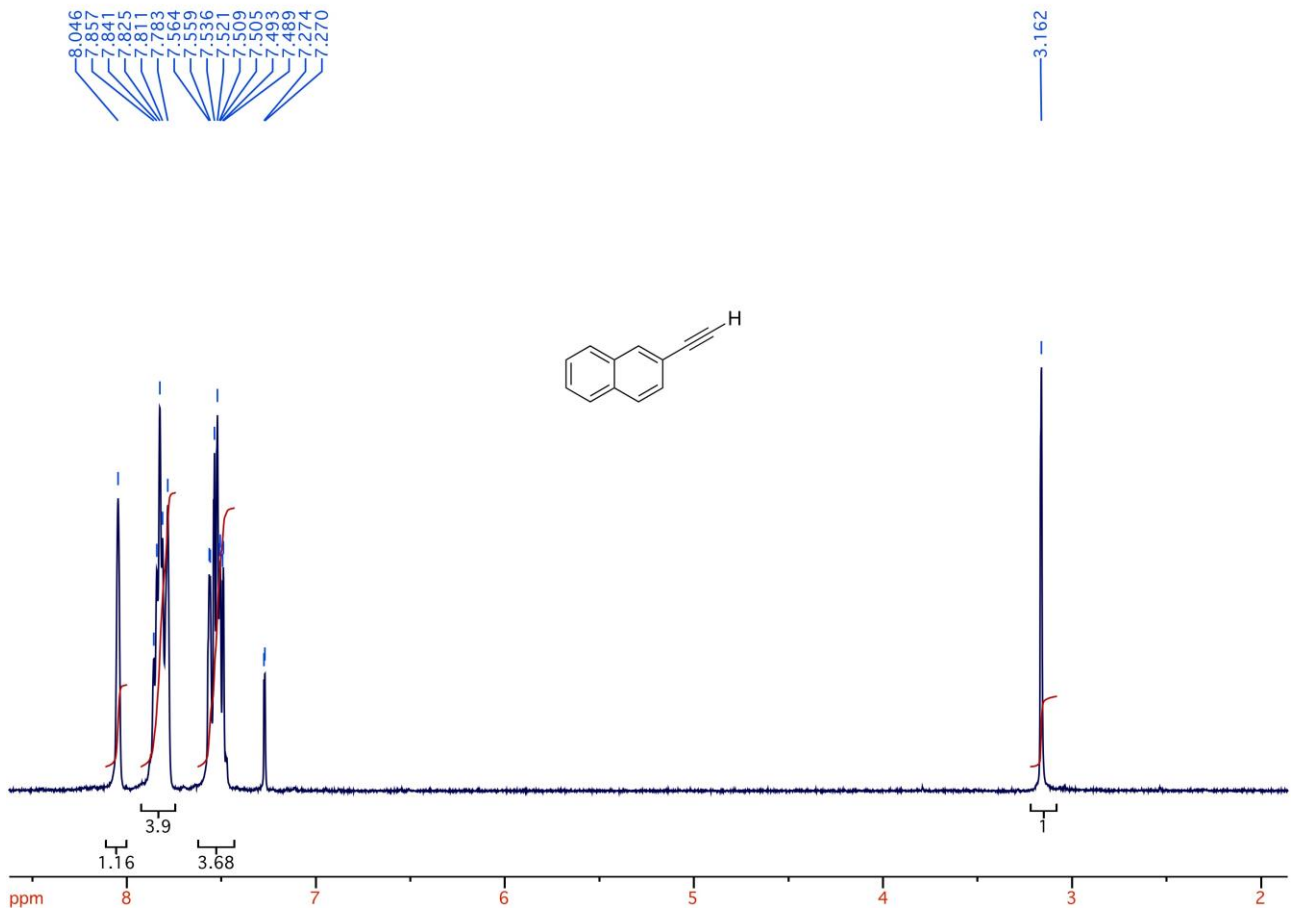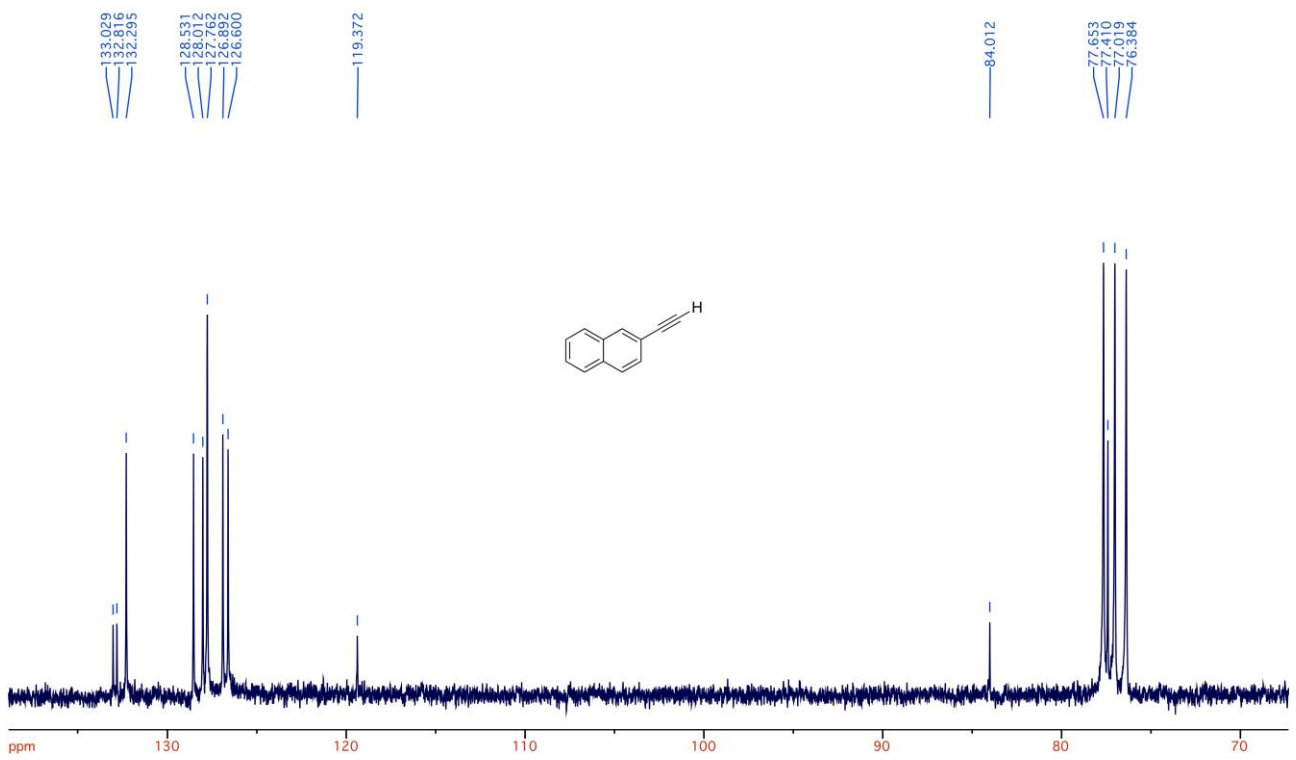

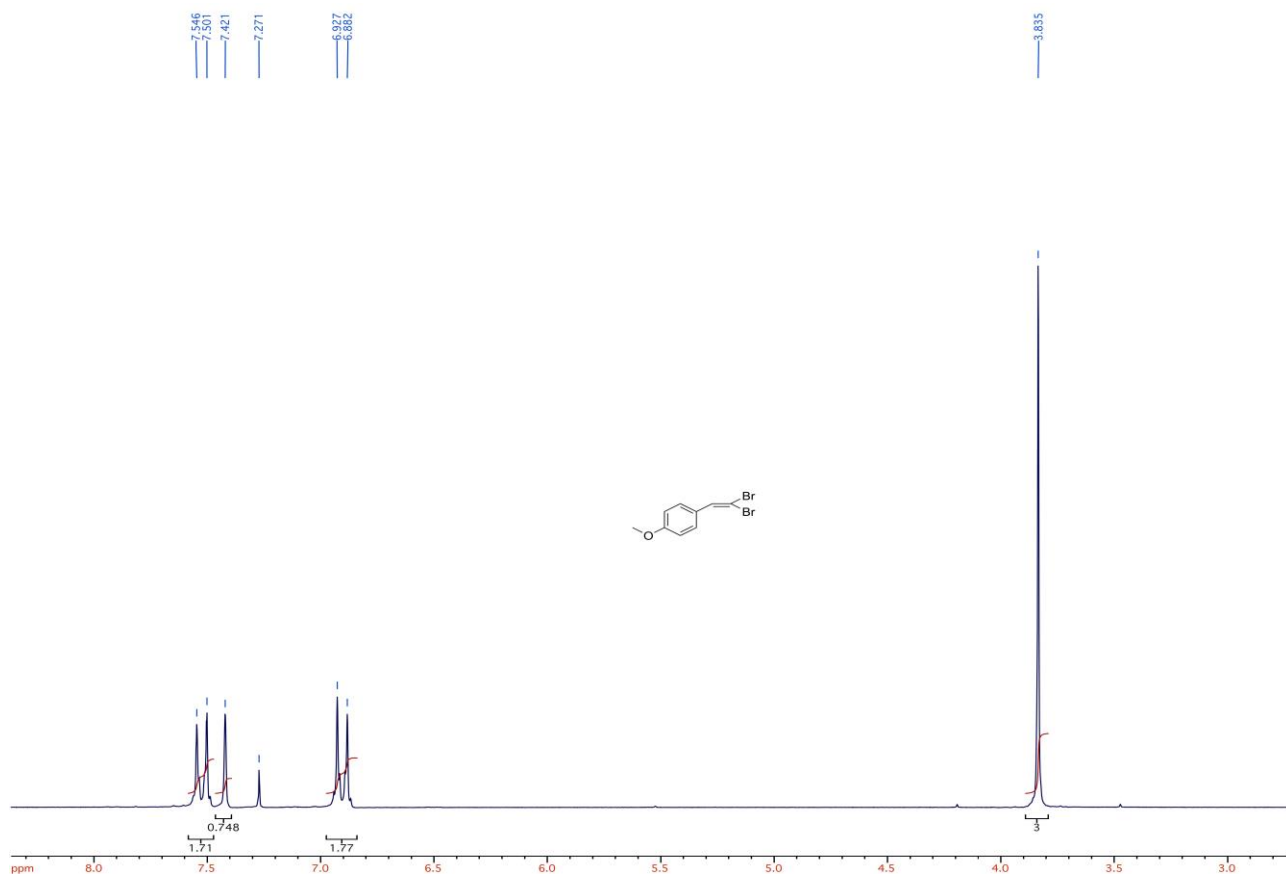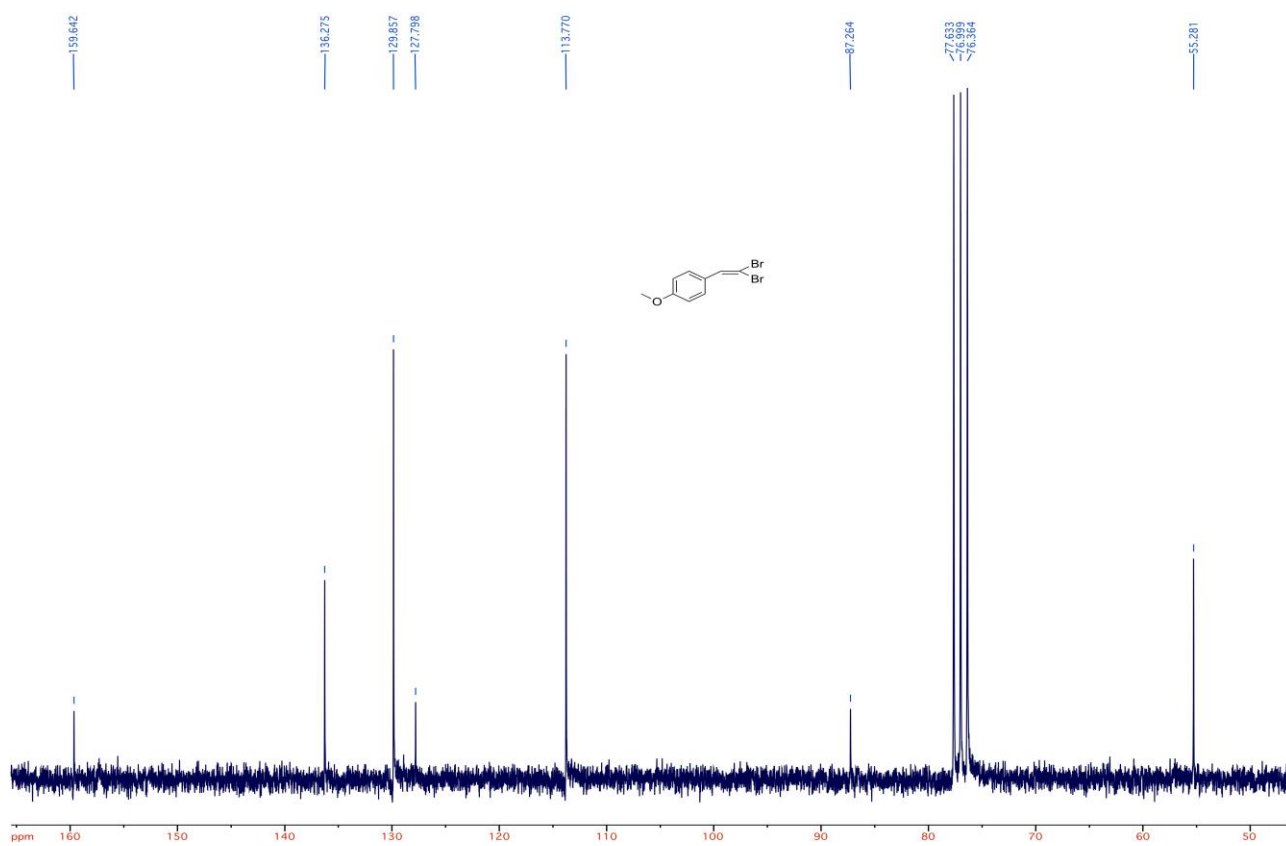



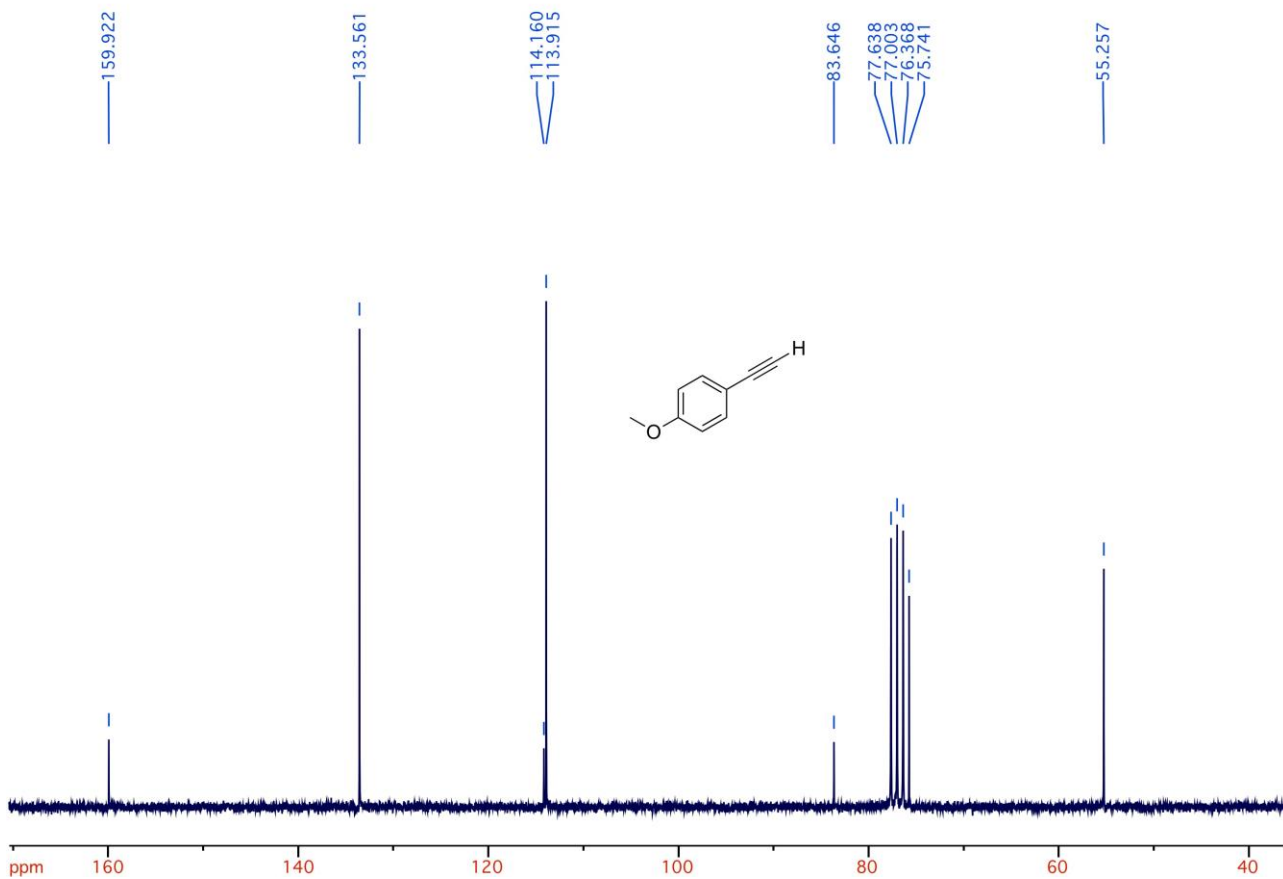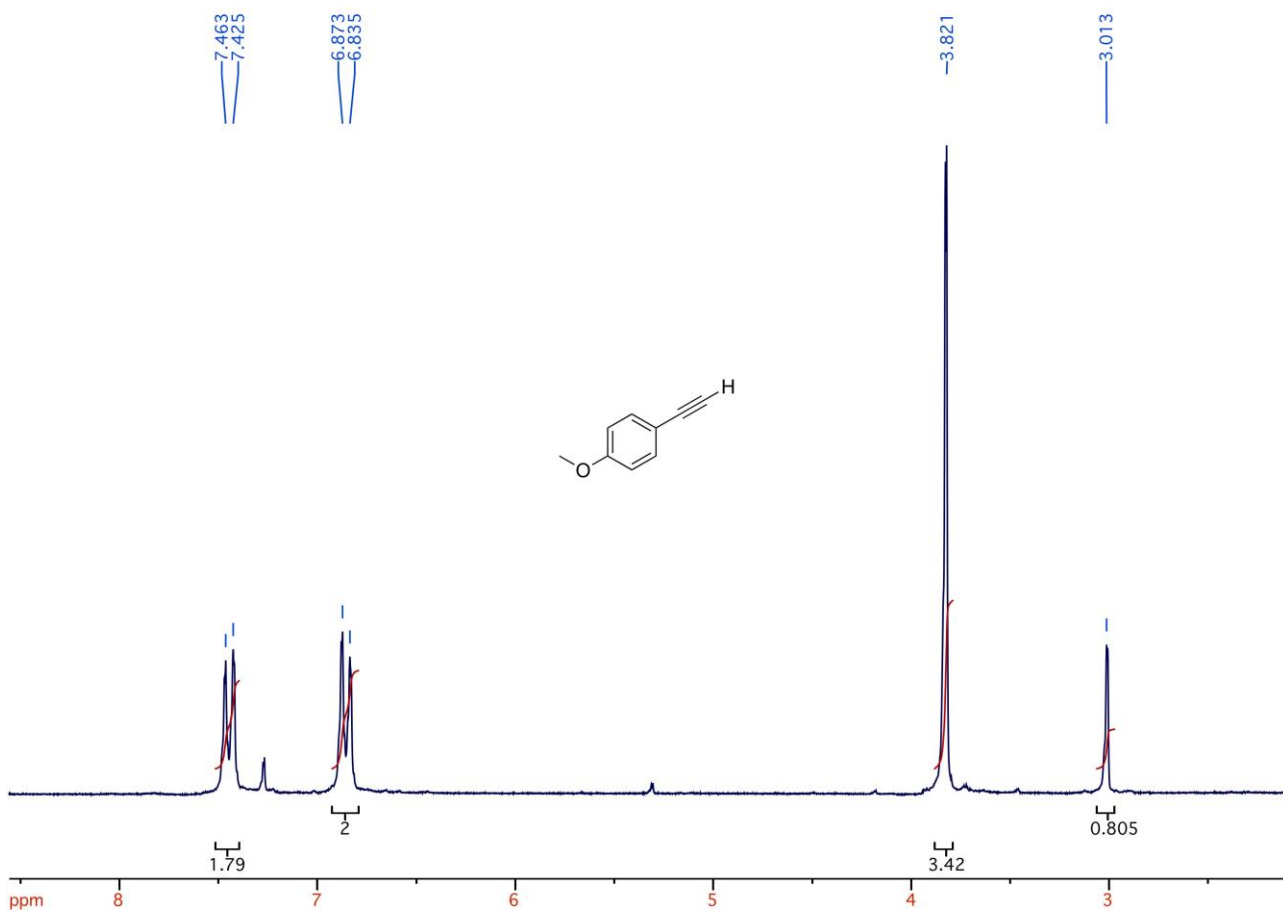

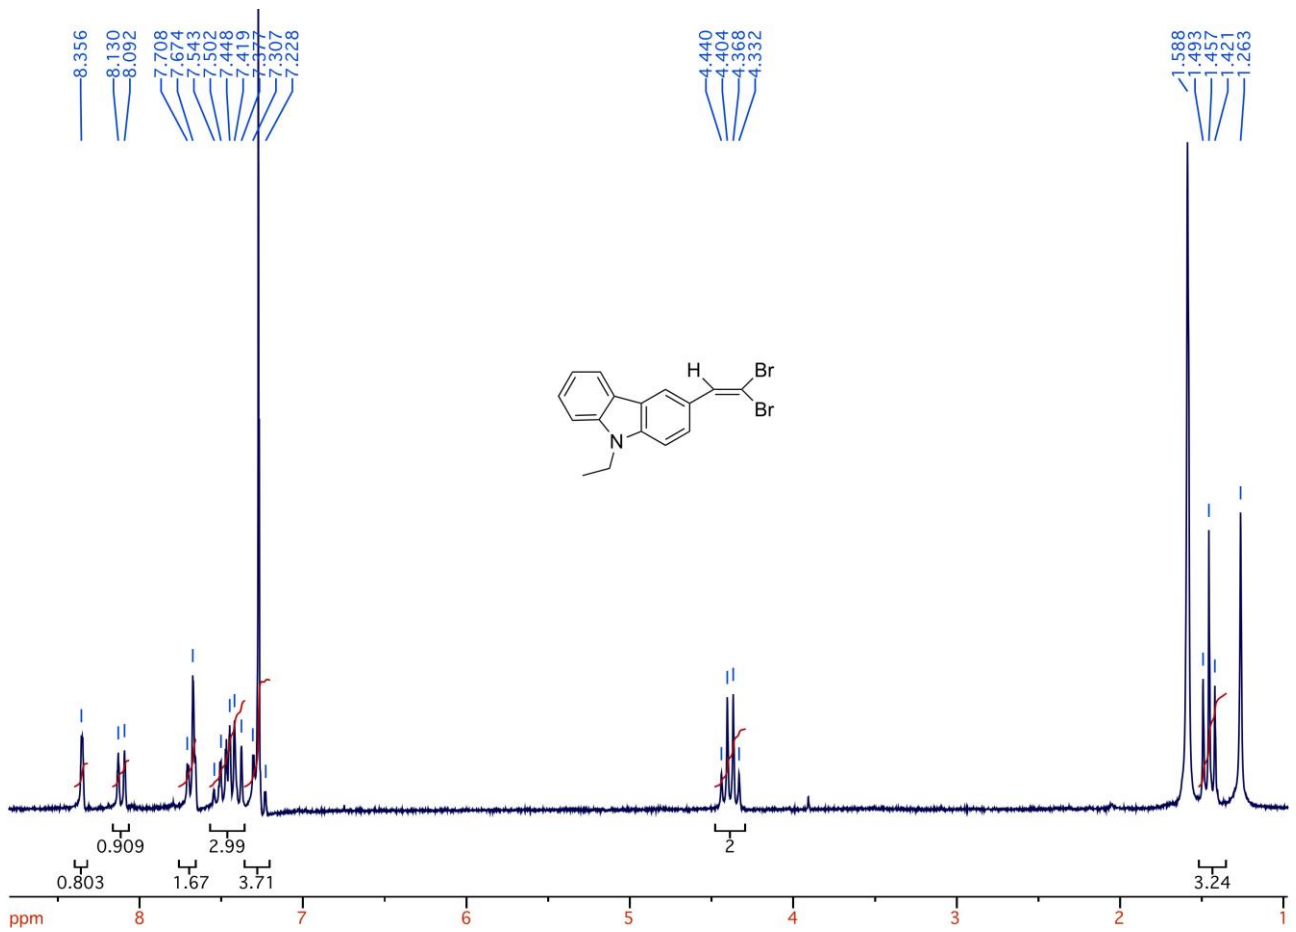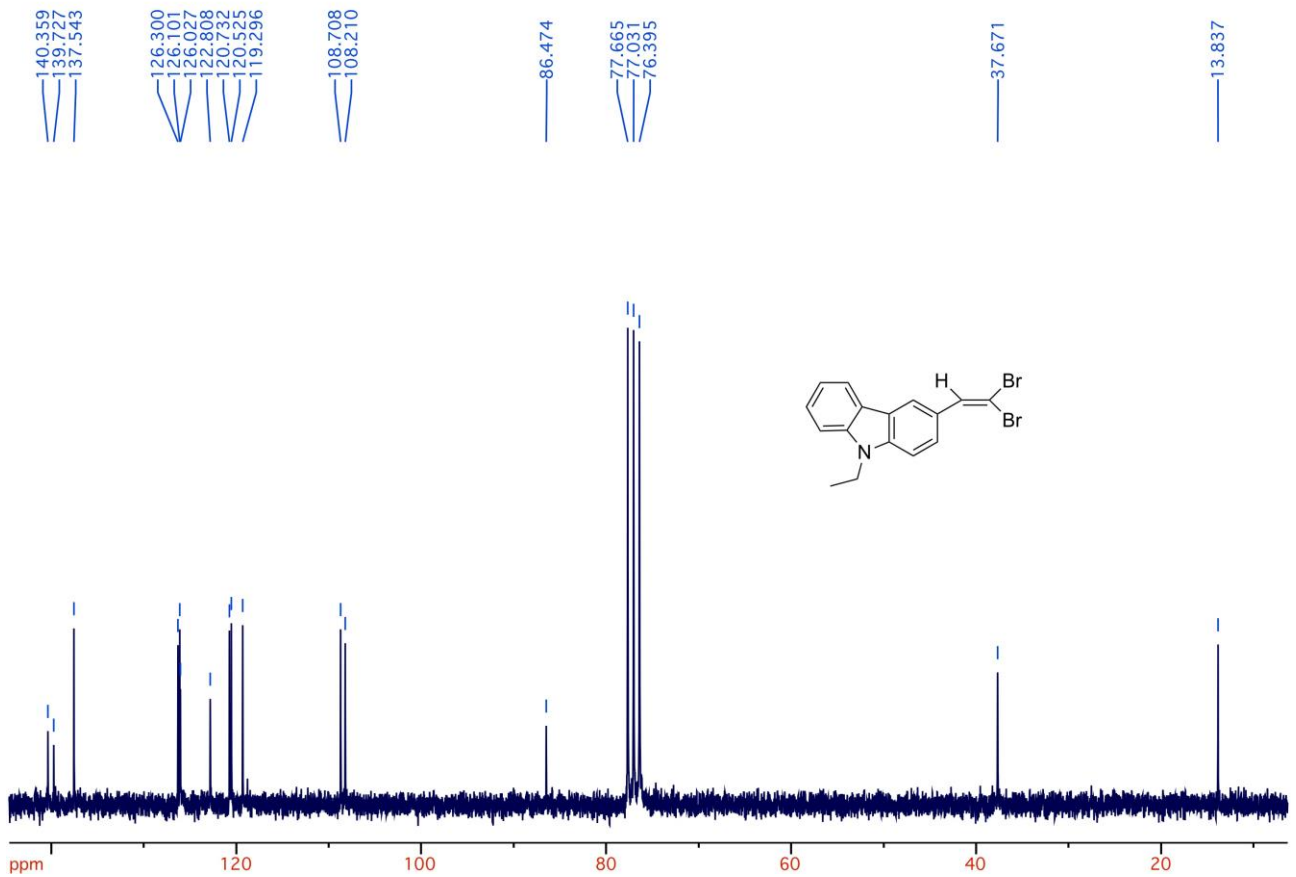

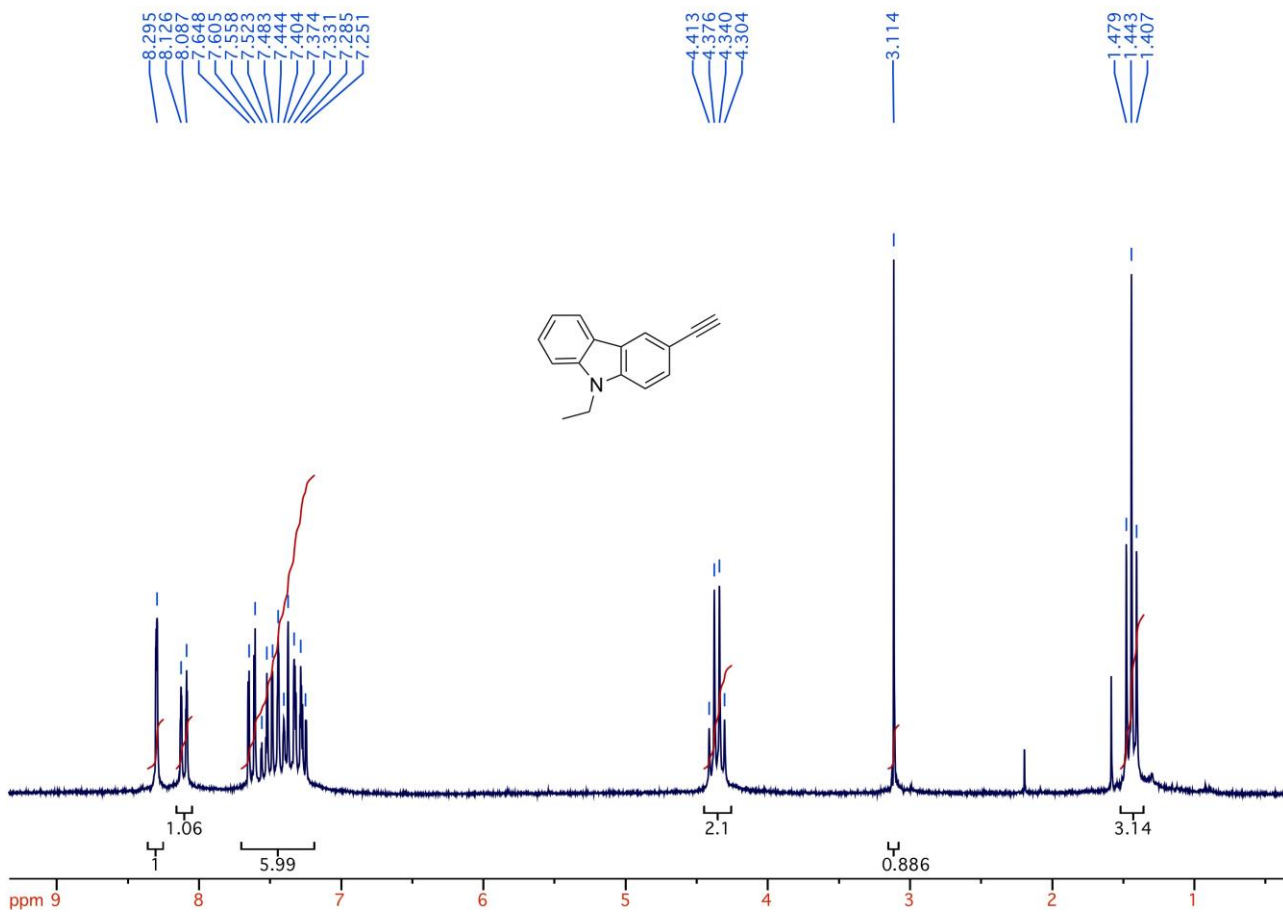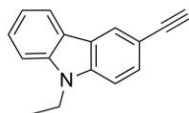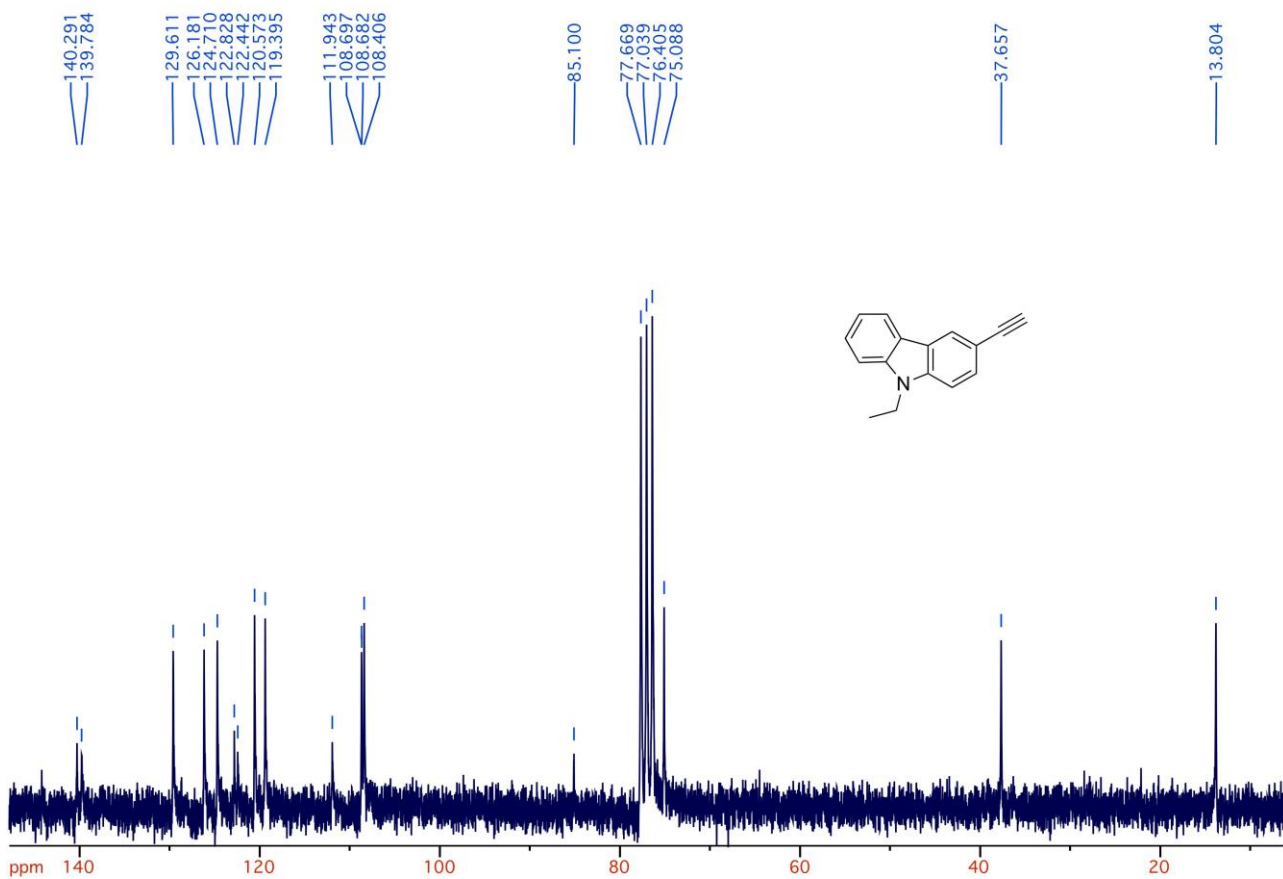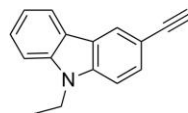

Supplement: Additional file 1 [file 1860-5397-14-76-S1.pdf]
